# Supplementary material
Source: MDPI journal article supplement (https://www.mdpi.com/2227-9717/11/11/3160)
Supplement: s1 [file s1 › processes-2636970-supplementary.pdf]

## Supporting Information

# Study of Indium Phosphide Quantum Dots/Carbon Quantum Dots System for Enhanced Photocatalytic Hydrogen Production from Hydrogen Sulfide

Yijiang Chen <sup>1,2</sup>, Shan Yu <sup>1,2,\*</sup>, Yunqian Zhong <sup>3</sup>, Yi Wang <sup>2</sup>, Jiale Ye <sup>2</sup> and Ying Zhou <sup>1,2,\*</sup>

<sup>1</sup> State Key Laboratory of Oil and Gas Reservoir Geology and Exploitation, Southwest Petroleum University, Chengdu 610500, China

<sup>2</sup> School of New Energy and Materials, Southwest Petroleum University, Chengdu 610500, China; e-mail: yushan@swpu.edu.cn (Y.W.), yzhou@swpu.edu.cn (J.Y.)

<sup>3</sup> Meishan Vocational and Technical College, Meishan 620000, China.

\* Authors to whom correspondence should be addressed.

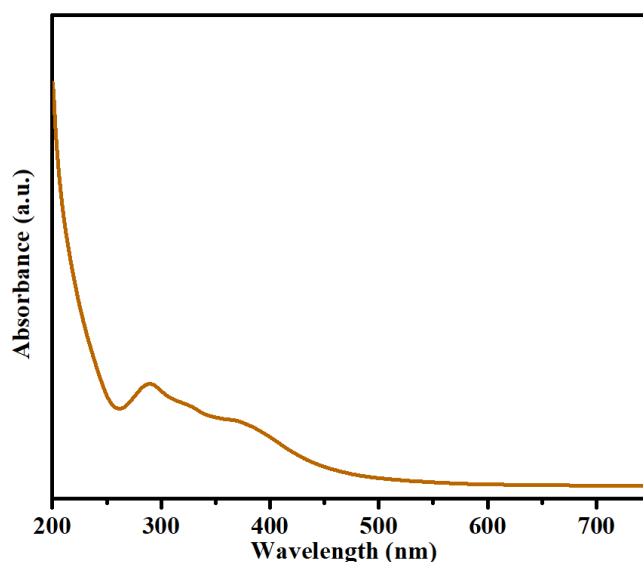

Figure S1 UV-vis spectrum of CQDs.

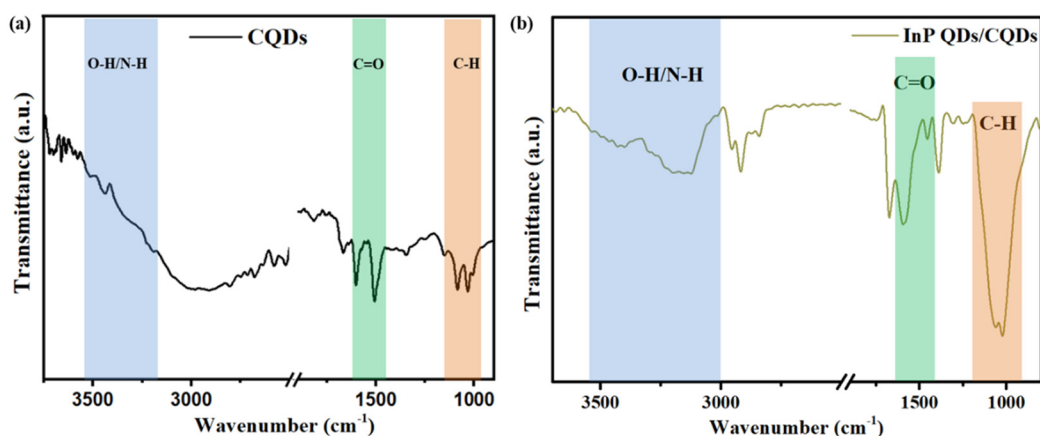

Figure S2 The FTIR spectra of (a) CQDs and (b) InP QDs/CQDs system.

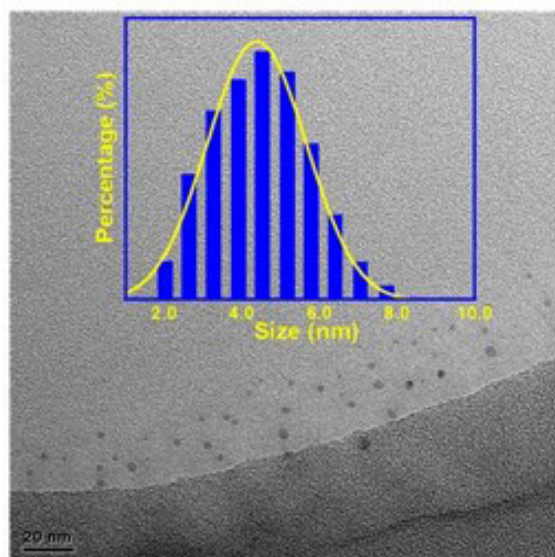

Figure S3 TEM of CQDs.

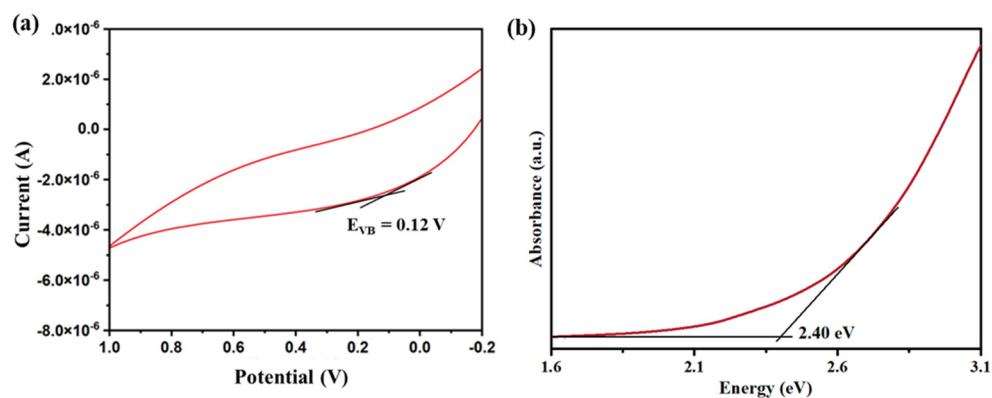

Figure S4 (a) Band gap calculation of CQDs from CV measurements. Electrolyte: tetrabutylammonium tetrafluoroborate (0.1 M); scan rate:  $10 \text{ mV s}^{-1}$ . (b)  $(\alpha h \nu)^2$  and Energy curve graph of CQDs.

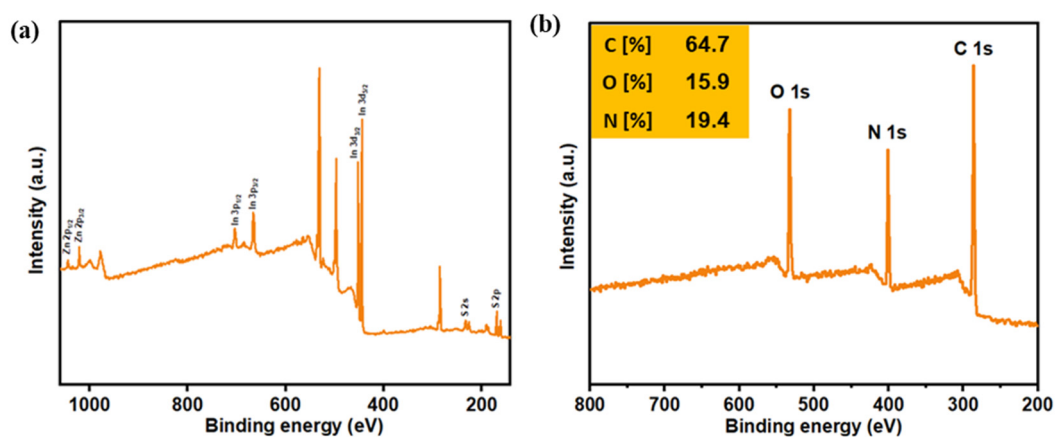

Figure S5 The XPS survey spectra of (a) InP QDs and (b) CQDs.

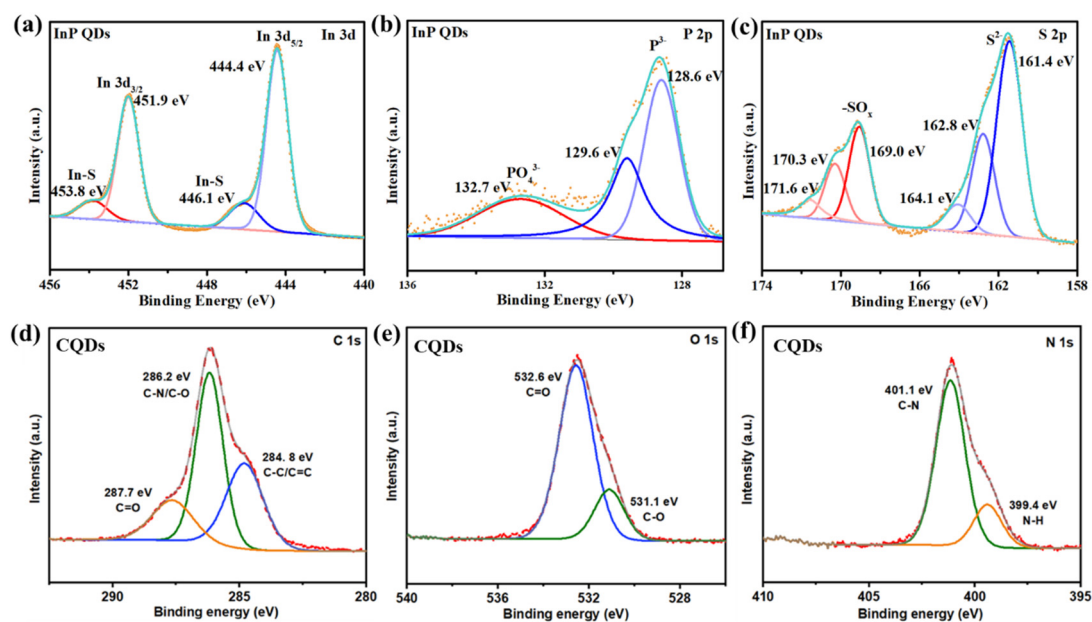

**Figure S6** The XPS fine spectra of InP QDs and CQDs. (a) In 3d; (b) P 2p; (c) S 2p of InP QDs. (d) C 1s; (e) O 1s; (f) N 1s of CQDs.

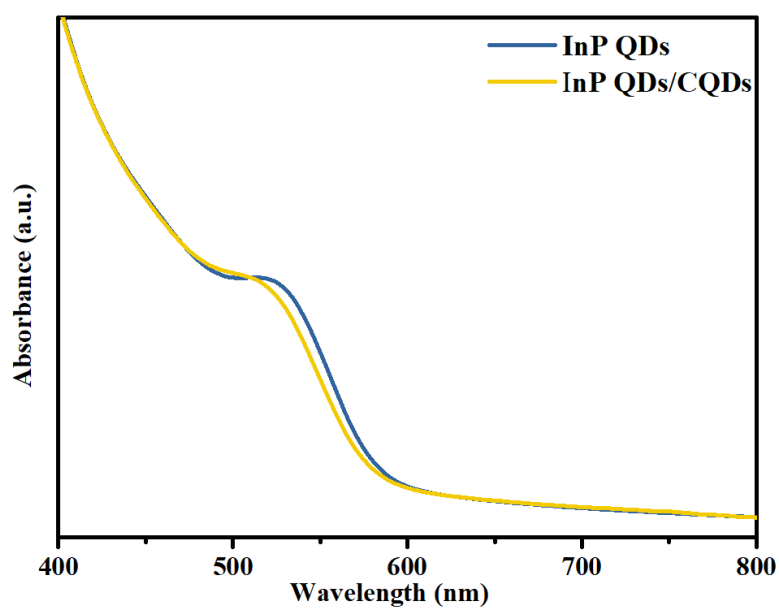

**Figure S7** UV-vis spectra of InP QDs and InP QDs/CQDs system.

**Table S1** The wt.% element composition of InP QDs by ICP-OES measurement

| Sample  | In (wt.%) | P (wt.%) | S (wt.%) | Zn (wt.%) | P: In | S:In | Zn:In |
|---------|-----------|----------|----------|-----------|-------|------|-------|
| InP QDs | 41.87     | 7.62     | 7.12     | 3.93      | 0.18  | 0.17 | 0.09  |
